# Supplementary material for: Obesogenic Clusters Associated with Weight Status in Brazilian Adolescents of the Movimente School-Base Intervention
Source: MDPI journal article supplement (doi:10.3390/ijerph181910350), 2021-09-30
Supplement: s1 [file s1]

# Supplementary Materials

**Table S1.** Factor loading to dietary patterns resulting from Principal Component Analysis in Brazilian adolescents ( $n = 812$ ).

| Variables | Components |      |
|-----------|------------|------|
|           | SSB        | F&V  |
| Fruit     |            | 0.68 |
| Vegetable |            | 0.64 |
| Crisps    | 0.58       |      |
| Candies   | 0.53       |      |
| Soda      | 0.54       |      |

Kaiser Meyer Olkin= 0.61. Bartlett test of sphericity  $p < 0.001$ ). F&V = fruit and vegetables. SSB = sugar, salt and beverages (soda).

**Table S2.** Latent class models parameters

| Model        | Log Likelihood | Degrees of Freedom | BIC     | ABIC    | CAIC    | Likelihood Ratio |
|--------------|----------------|--------------------|---------|---------|---------|------------------|
| Total sample |                |                    |         |         |         |                  |
| Model 1      | -3236.52       | 63                 | 6586.94 | 6532.96 | 6603.94 | 99.9405          |
| Model 2      | -3220.93       | 54                 | 6616.04 | 6533.47 | 6642.04 | 68.7430          |
| Model 3      | -3212.59       | 45                 | 6659.67 | 6548.52 | 6694.67 | 52.0739          |
| Model 4      | -3204.84       | 36                 | 6704.45 | 6564.72 | 6748.45 | 36.5628          |
| Model 5      | -3200.62       | 27                 | 6756.32 | 6588.01 | 6809.32 | 28.1386          |
| Boys         |                |                    |         |         |         |                  |
| Model 1      | -1431.18       | 63                 | 2963.61 | 2909.67 | 2980.61 | 103.42           |
| Model 2      | -1422.52       | 54                 | 2999.90 | 2917.40 | 3025.90 | 86.11            |
| Model 3      | -1415.49       | 45                 | 3039.42 | 2928.37 | 3074.42 | 72.03            |
| Model 4      | -1409.41       | 36                 | 3080.88 | 2941.27 | 3124.88 | 59.88            |
| Model 5      | -1401.88       | 27                 | 3119.41 | 2951.25 | 3172.41 | 44.81            |
| Girls        |                |                    |         |         |         |                  |
| Model 1      | -1751.08       | 63                 | 3605.09 | 3551.14 | 3622.09 | 83.57            |
| Model 2      | -1742.81       | 54                 | 3643.04 | 3560.53 | 3669.04 | 67.03            |
| Model 3      | -1737.05       | 45                 | 3686.01 | 3574.95 | 3721.01 | 55.51            |
| Model 4      | -1731.54       | 36                 | 3729.47 | 3589.84 | 3773.47 | 44.48            |
| Model 5      | -1727.00       | 27                 | 3774.89 | 3606.70 | 3827.89 | 35.41            |

BIC: Bayesian information criterion; ABIC: Adjusted Bayesian information criterion, CAIC: Consistent Akaike information criterion.

**Table S3.** Prevalence and item-response probabilities for the 2 latent class model of physical activity, diet and sedentary behavior of Brazilian adolescents.

|                             | <b>Total Sample (<i>n</i> = 812)</b> |                | <b>Boys (<i>n</i> = 386)</b> |                | <b>Girls (<i>n</i> = 426)</b> |                |
|-----------------------------|--------------------------------------|----------------|------------------------------|----------------|-------------------------------|----------------|
|                             | <b>Class 1</b>                       | <b>Class 2</b> | <b>Class 1</b>               | <b>Class 2</b> | <b>Class 1</b>                | <b>Class 2</b> |
| Latent Class <i>n</i> (%)   | 456 (56.16)                          | 356 (43.84)    | 191 (49.48)                  | 195 (50.52)    | 148 (34.74)                   | 278 (65.26)    |
| Item-response probabilities |                                      |                |                              |                |                               |                |
| PA (minutes/week)           |                                      |                |                              |                |                               |                |
| <300                        | 0.47                                 | 0.27           | 0.46                         | 0.15           | 0.50                          | 0.30           |
| 300 to 419                  | 0.09                                 | 0.13           | 0.05                         | 0.10           | 0.14                          | 0.14           |
| ≥420                        | 0.44                                 | 0.60           | 0.48                         | 0.76           | 0.37                          | 0.56           |
| SB (hours/day)              |                                      |                |                              |                |                               |                |
| <2                          | 0.19                                 | 0.17           | 0.13                         | 0.15           | 0.30                          | 0.00           |
| 2 to 4                      | 0.20                                 | 0.33           | 0.13                         | 0.28           | 0.39                          | 0.11           |
| >4                          | 0.61                                 | 0.50           | 0.73                         | 0.57           | 0.31                          | 0.89           |
| F&V (times/week)            |                                      |                |                              |                |                               |                |
| <2                          | 0.53                                 | 0.00           | 0.56                         | 0.00           | 0.24                          | 0.36           |
| 2 to 4                      | 0.43                                 | 0.30           | 0.44                         | 0.41           | 0.33                          | 0.28           |
| >4                          | 0.04                                 | 0.70           | 0.00                         | 0.59           | 0.43                          | 0.36           |
| SSB (times/ week)           |                                      |                |                              |                |                               |                |
| < 1                         | 0.14                                 | 0.13           | 0.14                         | 0.07           | 0.22                          | 0.00           |
| 1 to 2                      | 0.33                                 | 0.44           | 0.32                         | 0.49           | 0.39                          | 0.29           |
| >2                          | 0.54                                 | 0.43           | 0.54                         | 0.44           | 0.39                          | 0.71           |

PA = physical activity. SB = sedentary behaviors. F&V = fruit and vegetables. SSB = sugar, salt and beverages.
